1 **A long-range chromatin interaction regulates SATB homeobox 1 gene expression in**  
2 **trophoblast stem cells**

3

4

5 Wei Yu<sup>1\*</sup>, V. Praveen Chakravarthi<sup>1\*</sup>, Shaon Borosha<sup>1\*</sup>, Anamika Ratri<sup>1</sup>, Khyati Dalal<sup>1</sup>, Michael  
6 W. Wolfe<sup>2,3</sup>, Rebekah R. Starks<sup>4</sup>, Geetu Tuteja<sup>4</sup>, and M.A. Karim Rumi<sup>1,3@</sup>

7

8

9 <sup>1</sup>Department of Pathology and Laboratory Medicine, <sup>2</sup>Department of Molecular and Integrative  
10 Physiology, <sup>3</sup>Institute for Reproduction and Perinatal Research, University of Kansas Medical  
11 Center, Kansas City, KS.

12 <sup>4</sup>Department of Genetics, Development and Cell Biology, Iowa State University, Ames, IA.

13 (\* equal contribution in completing the study and preparing the manuscript)

14

15 ***Running title:*** Regulation of *Satb* homeobox1 in trophoblast stem cells

16

17 ***Keywords:*** SATB homeobox 1, trophoblast stem cells, transcriptional regulation, distant-acting  
18 enhancer, chromatin looping

19

20

21 ***@Address correspondence to:*** M. A. Karim Rumi, Department of Pathology and Laboratory  
22 Medicine, University of Kansas Medical Center, Kansas City, KS 66160. Telephone: 913-588-  
23 8059; Email: [mrumi@kumc.edu](mailto:mrumi@kumc.edu)

24 **ABSTRACT**

25           SATB homeobox proteins are important regulators of developmental gene expression.  
26 Among the stem cell lineages determined during early embryonic development, trophoblast stem  
27 (TS) cells exhibit robust SATB expression. Both SATB1 and SATB2 act to maintain trophoblast  
28 stem-state. However, the molecular mechanisms that regulate TS-specific *Satb* expression are not  
29 yet known. We identified *Satb1* variant 2 as the predominant transcript in trophoblasts. Histone  
30 marks, and RNA polymerase II occupancy in TS cells indicated active state of the promoter. A  
31 novel cis-regulatory region with active histone marks was identified ~21kbp upstream of variant  
32 2 promoter. CRISPR/Cas9 mediated disruption of this sequence decreased *Satb1* expression in TS  
33 cells and chromatin conformation capture confirmed looping of this regulatory region into the  
34 promoter. Scanning position weight matrices across the enhancer predicted two ELF5 binding sites  
35 in close vicinity of SATB1 sites, which were confirmed by chromatin immunoprecipitation.  
36 Knockdown of ELF5 downregulated *Satb1* expression in TS cells and overexpression of ELF5  
37 increased the enhancer-reporter activity. Interestingly, ELF5 interacts with SATB1 in TS cells,  
38 and the enhancer activity was upregulated following SATB overexpression. Our findings indicate  
39 that trophoblast-specific *Satb1* expression is regulated by long-range chromatin looping of an  
40 enhancer that interacts with ELF5 and SATB proteins.

## 41 INTRODUCTION

42 SATB homeobox proteins (SATB1 and SATB2) are global chromatin organizers and  
43 transcriptional regulators important for tissue specific gene expression and cell lineage  
44 development. SATB proteins bind to AT-rich elements in matrix-attachment regions of actively  
45 transcribing DNA and interact with chromatin remodeling proteins as well as transcription factors  
46 to activate or repress gene expression [1-6]. SATB proteins play key roles in developmental  
47 processes, such as T cell differentiation [7-9], erythroid development [10], osteoblast  
48 differentiation and craniofacial patterning [11], cortical neuron organization [12-14],  
49 hematopoietic stem cell self-renewal [15], and embryonic stem (ES) cell pluripotency [16]. A  
50 recent study has reported that SATB proteins play distinct roles in lineage determination during  
51 early embryonic development [17]. In our previous studies, we demonstrated that SATB proteins  
52 act to maintain the trophoblast cell stem-state and inhibit trophoblast differentiation [18, 19].

53

54 SATB proteins are expressed abundantly in both mouse and rat trophoblast stem (TS) cells  
55 while in the stem-state, but the expression declines during differentiation [18, 19]. During early  
56 gestation, trophoblast cells also show high levels of SATB expression, which decreases with the  
57 progression of gestation [18, 19]. Differential expression in the trophoblast stem-state indicates a  
58 potential role for TS-specific transcriptional regulators in controlling *Satb1* expression. However,  
59 the mechanisms responsible for regulating *Satb1* gene expression in TS cells or in the placenta are  
60 currently unknown.

61

62 SATB proteins are important regulators of TS cell renewal and differentiation [19]. TS  
63 cells are the precursors of specialized differentiated cell types in the placenta. Self-renewal of TS

64 cells and regulated differentiation into multiple trophoblast lineages are essential for proper  
65 placental development, function and maintenance of pregnancy [20-22]. SATB proteins are a part  
66 of a regulatory network that controls the development of the trophoblast lineage and regulates their  
67 differentiation. Insight into the transcriptional regulation of SATB expression in trophoblast cells  
68 will provide opportunities to manipulate its expression, which could have a wide range of  
69 applications in experimental biology.

70

71 In this study, we detected *Satb1* transcript variants expressed in trophoblast cells, and  
72 determined their promoters. We also identified a distant-acting cis enhancer that forms a long-  
73 range chromatin interaction with the proximal promoter to regulate trophoblast-specific *Satb1*  
74 expression.

75

## 76 MATERIALS AND METHODS

77 **Cell culture.** Two TS cell models were included in this study: mouse TS cells and Rcho1  
78 rat TS cells. Mouse TS cells (obtained from Dr. Janet Rossant, Hospital for Sick Children, Toronto,  
79 Canada) were maintained in FGF4/ heparin supplemented TS culture medium [containing 30% TS  
80 basal medium (RPMI supplemented with 20% FBS, 1mM sodium pyruvate and 100µM 2-  
81 mercaptoethanol), 70% mouse embryonic fibroblast-conditioned medium, 25ng/ml FGF4 and  
82 1µg/ml heparin] as described previously [23]. Differentiation of the cells was induced by removal  
83 of FGF4, heparin and mouse embryonic fibroblast conditioned medium [23]. ES-E14Tg2A (E14)  
84 mouse embryonic stem (ES) cells (obtained from ATCC, Manassas, VA) were maintained in  
85 RESGRO (SCM001) culture media (EMD Millipore) on feeder-free, gelatin-coated culture dishes.  
86 Extraembryonic endoderm stem (XEN) cells (obtained from Dr. Janet Rossant) were grown in  
87 Base XEN medium (RPMI supplemented with 15% FBS, 1 mM sodium pyruvate and 50µM 2-

88 mercaptoethanol) as published earlier [24]. Rcho-1 TS cells (a rat choriocarcinoma cell line  
89 obtained from Dr. Michael Soares, University of Kansas Medical Center, Kansas City, KS) were  
90 maintained in TS basal medium (RPMI supplemented with 20% FBS, 1mM sodium pyruvate and  
91 50 $\mu$ M 2-mercaptoethanol), as previously reported [25]. Differentiation was induced by growing  
92 the cells to near confluence and removing FBS [25]. 293FT cells (purchased from Thermo Fisher  
93 Scientific) were maintained in DMEM supplemented with 10% FBS and 4mM glutamine. All cell  
94 cultures were carried out at 37°C in a humidified 5% CO<sub>2</sub> atmosphere.

95  
96 To reprogram ES cells, pCAG-hCdx2ERT2-ires-puro (obtained from Dr. Jon Draper,  
97 McMaster University, Canada) or pCAG-hGata3ERT2-ires-puro (obtained from Dr. Janet  
98 Rossant) vectors were stably transfected into E14 mouse ES cells using lipofectamine 2000  
99 (Thermo Fisher scientific). Cells were selected for puromycin resistance, and transgenes were  
100 activated by supplementing TS medium with 1  $\mu$ g/ml 4-OH tamoxifen (Millipore Sigma). Cells  
101 were fed daily with the tamoxifen containing TS medium for 6 days and analyzed for gene  
102 expression [26]. Human ES cells H9 (WA09, WiCell Research Institute, Inc) were converted to  
103 trophoblasts by exposing them to BMP4, A83-01 and PD173074 in the absence of FGF2 for 2  
104 days and analyzed for gene expression [27].

105  
106 **Gene expression analysis.** Gene expression analysis at the mRNA level was performed  
107 by conventional RT-PCR, RT-qPCR and RNA-seq, whereas cellular protein expression was  
108 assessed by immunofluorescence and western blot analysis.

109  
110 *RT-PCR and qRT-PCR-* RNA was extracted by using TRI Reagent (Sigma-Aldrich)

111 according to manufacturer's instructions. cDNAs were reverse transcribed from 2µg of total RNA  
112 by using Applied Biosystems High-Capacity cDNA Reverse Transcription Kits (Thermo Fisher  
113 Scientific). Conventional PCR amplification of cDNA was done in a 25µl reaction volume by  
114 using DreamTaq Green DNA polymerase (Thermo Fisher Scientific). Real-time RT-qPCR  
115 amplification of cDNAs was carried out in a 20µl reaction mixture containing Applied Biosystems  
116 Power SYBR Green PCR Master Mix (Thermo Fisher Scientific). Amplification and fluorescence  
117 detection of qRT-PCR were carried out on Applied Biosystems StepOne Real Time PCR System  
118 (Thermo Fisher Scientific). The  $\Delta\Delta CT$  method was used for relative quantification of target  
119 mRNA normalized to 18S RNA. All PCR primers were designed using Primer3 [28] and the  
120 sequences are shown in Table S1-S3.

121

122 *RNA sequencing-* RNA-Seq data was previously generated and analyzed [29]. FPKM  
123 values were extracted from data deposited in GEO, under accession GSE65808.

124

125 *Immunofluorescent Microscopy-* Mouse ES, TS or XEN cells were grown on coverslips  
126 placed in six-well tissue culture plates. After fixation in 4% formaldehyde for 10 min and  
127 permeabilization in 0.5% Triton X-100 for 10 min, the coverslips were blocked with 5% BSA for  
128 1h at room temperature. After blocking, the cells were incubated with appropriately diluted  
129 primary antibodies: anti-SATB1 (ab109122, Abcam at 1:1000) and either anti-CDX2 (cdx2-88,  
130 BioGenex at 1:200), or anti-OCT4 (Sc-5279, Santa Cruz Biotechnology at 1:200) or anti-GATA4  
131 (sc-25310, Santa Cruz Biotechnology at 1:200) at room temperature for 2h. After washing the  
132 unbound primary antibodies, secondary antibody staining was performed with Alexa Fluor 568-  
133 or 488- labeled detection reagents (goat anti-rabbit, goat anti-mouse antibodies; Molecular Probes)

134 at 1:200 dilution, and DNA staining was performed by DAPI (Prolong Gold Antifade Mountant,  
135 Thermo Fisher Scientific). The images were captured on a Nikon Eclipse 80i microscope.

136

137 *Western Blotting-* Cell lysates were prepared in 1x SDS Sample Buffer (62.5 mM Tris-HCl  
138 pH 6.8, 2%SDS, 42mM DTT, 10% glycerol and 0.01% bromophenol blue; Cell Signaling  
139 Technology), sonicated to shear DNA and reduce viscosity and then heat denatured. Proteins were  
140 separated on 4-20% SDS-PAGE and transferred to PVDF membranes. Membranes were blocked  
141 with 5% milk and incubated with primary antibodies for 1h at room temperature. Then the  
142 membranes were incubated with following primary antibodies at appropriate dilution in blocking  
143 buffer: anti-SATB1 (ab109122, Abcam 1: 10000), anti-SATB2 (ab92446, sc-81376, 1:2000), anti-  
144 CDX2 (Abcam, 1:5000), anti-OCT4 (sc-5279, Santa Cruz Biotechnology, 1:2000), anti-GATA4  
145 (sc-25310, Santa Cruz Biotechnology, 1:2000), anti-FLAG (#14793, Cell Signaling Technology,  
146 1:5000) and ELF5 (sc-9645, Santa Cruz Biotechnology, 1:2000). Anti-TUBA (MABT522,  
147 Millipore Sigma, 1:20000), anti-ACTB (A5441, Millipore Sigma, 1:30000) or anti-Histone H3  
148 (ab1791, Abcam, 1:20000) antibodies were used detect the expression of housekeeping genes as  
149 loading controls. Membranes were washed, blocked and incubated with peroxidase-conjugated  
150 anti-mouse, anti-rabbit or anti-goat secondary antibodies (Santa Cruz Biotechnology) at a dilution  
151 of 1:5000-20000, and immunoreactive signals were visualized using Luminata Crescendo Western  
152 HRP substrate (Millipore Sigma).

153

154 **Analysis of transcriptional landscape in *Satb1* promoter and enhancer.** Trophoblast-  
155 specific *Satb1* promoters were initially located by variant specific RT-PCR and RNA sequencing  
156 as described above. The locations of the proximal promoters and the distant-acting *Satb1* enhancer

157 were identified by analyses of H3K27ac ChIP-seq data. Identified promoters and the enhancer  
158 were further characterized for relevant histone marks and transcription factor binding by ChIP  
159 analyses.

160

161 *ChIP-Seq analyses for H3K27ac in mouse early placentas*- ChIP-Seq data was previously  
162 generated and analyzed [29]. Peak data was downloaded from GEO (GSE65807). Normalized  
163 wiggle signal tracks were generated using the bam\_to\_bigwig function in pybedtools [30].

164

165 *Chromatin Immunoprecipitation (ChIP) of mouse TS and Rcho1 rat TS cells*- Each ChIP  
166 sample was prepared with 15-20 million mouse TS or Rcho1 rat TS cells as described earlier [31].  
167 Briefly, cells were cross-linked in 1% formaldehyde for 10 minutes at room temperature, quenched  
168 in 0.125M glycine for 5 minutes, washed twice with cold PBS with 0.5% IGEPAL CA-630 and  
169 resuspended in cold lysis buffer (50mM Tris-HCl, pH 8, 10mM EDTA, 0.2% SDS) in the presence  
170 of PMSF and protease inhibitor cocktail (Sigma-Aldrich) for 30 minutes. Cell lysates were diluted  
171 1:1 with dilution buffer (0.01% SDS, 1.1% Triton X-100, 1.2mM EDTA, 16.7mM Tris-HCl, pH  
172 8.1, 167mM NaCl) then sonicated for 40 cycles (20 seconds on/60 sec off) at 70% amplitude to  
173 produce an average fragment size range of 300-600bp. Immunoprecipitation was performed using  
174 ~2.5-5 $\mu$ g antibody (anti-H3K27ac: 05-1334 Millipore Sigma, anti-H3K9ac: 07-352 Millipore  
175 Sigma, anti-H3K4me3: 07-473 Millipore Sigma, anti-SATB1: ab109122 Abcam, anti-SATB2: sc-  
176 81376 Santa Cruz Biotechnology, anti-ELF5: sc-9645x Santa Cruz Biotechnology, anti-Pol II: sc-  
177 47701 Santa Cruz Biotechnology, anti-FLAG M8823 Millipore Sigma) conjugated to 50 $\mu$ l protein  
178 A/G magnetic beads (Dynabeads, Thermo Fisher Scientific) overnight. Bead-chromatin  
179 complexes were washed using High Salt Buffer (0.1% SDS, 1% Triton X-100, 2mM EDTA, 20mM



180 Tris-HCl, pH 8.1, 500mM NaCl), Low Salt Buffer (0.1% SDS, 1% Triton X-100, 2mM EDTA,  
181 20mM Tris-HCl, pH 8.1, 150mM NaCl), LiCl Buffer (0.25M LiCl, 1% IGEPAL, 1% Deoxycholic  
182 acid, 1mM EDTA, 10mM Tris-HCl, pH 8.1) and TE buffer (10mM Tris-HCl, 1mM EDTA, pH  
183 8.0), with each wash performed twice for 5 minutes. Cell lysis, sonication, immunoprecipitation  
184 and cleanup steps were all performed at 4 °C. Finally, chromatin DNA was eluted from the  
185 magnetic beads using elution buffer (1% SDS, 0.1M NaHCO<sub>3</sub>), protein-DNA crosslinks were  
186 reversed with the addition of 5M NaCl and heating on a shaker incubator overnight and purified  
187 using Qiaquick columns (Qiagen). DNA was eluted in 100µl of 10mM Tris-HCl and 2.5 to 5 µl  
188 aliquots were used in qPCR analyses. qPCR primers for the target sites are shown in Table S4.  
189 Mouse positive control primer set Actb2 (#71017, Active Motif) and mouse negative control  
190 primer set 1 (#71011, Active Motif) were used for validating the ChIP assays (Fig. S1).

191

192 ***Characterization of the distant-acting Satb1 enhancer.*** Requirement of the distant-acting  
193 enhancer in transcriptional regulation of *Satb1* was assessed by targeted disruption of the locus  
194 using CRISPR/Cas9. Chromatin looping and interaction of the distant enhancer with the proximal  
195 promoter was demonstrated by Chromatin Conformation Capture (3C).

196

197 ***CRISPR/Cas9 mediated interference and deletion of the enhancer-*** CRISPR guide RNAs  
198 that specifically target the *Satb1* var2 promoter and *enhancer S* were designed to have limited off-  
199 targets using an online tool (<http://crispr.mit.edu/>). All gRNA sequences are listed in Table S5.  
200 Oligonucleotides encoding the gRNAs were annealed and cloned into the phU6-gRNA (Addgene,  
201 Plasmid #53188) [32] following guidelines from the Zhang lab ([http://www.genome-  
202 engineering.org/crispr/?page\\_id=23](http://www.genome-engineering.org/crispr/?page_id=23)). Rcho1 TS cells, a commonly used rat TS cell model, was

203 selected for the CRISPR/Cas9 mediated targeted deletion experiments because of its high  
204 transfection efficiency. For CRISPR/Cas9 mediated targeted deletion of the enhancer, Rcho1 cells  
205 were stably cotransfected with the vectors (pU6-gRNA) expressing enhancer gRNAs and Cas9  
206 (pLV hUbc-Cas9-T2A-GFP, Addgene, Plasmid #53190)[32] using Lipofectamine 2000  
207 transfection reagent (ThermoFisher Scientific) and selected for G418 resistance and GFP  
208 expression. Selected cells were screened for targeted deletion of *Satb1* enhancer ( $\Delta$  Enh S) using  
209 the PCR primers in Table S6 and characterized for trophoblast stem and differentiation markers.  
210 For CRISPR-interference, Rcho1 cells were co-transfected with the gRNA and dCas9 expression  
211 vector (pLV hUbc-dCas9-T2A-GFP; Addgene, Plasmid #53191) [26]. After 3 days of transfection,  
212 cells were harvested for RNA isolation and analyses of *Satb1* expression.

213

214 *Chromatin Conformation Capture (3C)*- 3C was carried out following a standard protocol  
215 [33]. 3C experiments performed in mouse TS cells were compared with that in mouse embryonic  
216 fibroblasts that do not express *Satb1*. Briefly, mouse TS cells and mouse embryonic fibroblasts  
217 were fixed in 1% formaldehyde for 10 min at room temperature. After quenching the crosslinking  
218 reaction with 0.125 M glycine for 5 min, cells were washed with cold PBS, resuspended in cold  
219 lysis buffer (10mM Tris-HCl pH 7.5, 10 mM NaCl, 5 mM MgCl<sub>2</sub>, 0.1 mM EGTA with protease  
220 inhibitors) and incubated on ice for 30 min. After centrifugation at 2000g for 5 min, pelleted nuclei  
221 were resuspended in 2 ml of cold lysis buffer. Approximately 10<sup>7</sup> nuclei were resuspended in 500 $\mu$ l  
222 of 1.2x FastDigest Restriction Enzyme Buffer (Thermo Fisher Scientific) containing 1.6% SDS  
223 and incubated for 1 h at 37°C with shaking at 250 rpm. SDS was subsequently quenched by  
224 adjusting the reaction to 2% Triton-X100 followed by another 1h incubation at 37°C with shaking.  
225 An aliquot of 20 $\mu$ l was taken from each sample and stored at -20°C for use as undigested genomic

226 DNA. Then 50 $\mu$ l of FastDigest *Bgl* II restriction enzyme (Thermo Fisher Scientific) was added to  
227 the reaction tube and incubated overnight at 37°C with shaking at 250rpm. The restriction enzyme  
228 was deactivated by adding 40 $\mu$ l of 20% SDS and heating at 65°C for 20 min. The reaction was  
229 diluted in 7ml of 1.1x T4 DNA ligase reaction buffer (Thermo Fisher Scientific), and 375 $\mu$ l of  
230 20% Triton-X100 was added and incubated at 37°C for 1h to quench SDS. Digested chromatin  
231 was ligated with 150U of T4 DNA ligase (Thermo Fisher Scientific) for 4h at 16°C. Formaldehyde  
232 crosslinks were reversed with Proteinase K digestion and overnight incubation at 65°C. RNAs  
233 were degraded with RNase treatment at 37°C for 1h. 3C libraries were purified by phenol-  
234 chloroform extraction and precipitated with 2.5 volumes of 100% ethanol and 0.1 volume of 3M  
235 sodium acetate and incubating at -80°C for 1h. Precipitated DNA was collected by centrifugation  
236 at 5000g for 1h and washed in 70% ethanol. DNA pellets were resuspended in 150 $\mu$ l of 10 mM  
237 Tris-HCl pH 7.5 and 3C products were checked by conventional PCR. PCR primers used in 3C  
238 analysis are shown in Table S7.

239

240 ***Transcription factor binding to the distal enhancer.*** Putative ELF5 and SATB1 binding  
241 sites were identified in the *Satb1* enhancer (chr17: 51993298-51994604) using TFBSTools [34],  
242 and a 90% match threshold. Position weight matrices (PWMs) for ELF5 and SATB1 were obtained  
243 from a motif library described previously [35]. This analysis predicted multiple ELF5 binding sites  
244 near SATB1 binding sites. Further confirmation of these potential transcription factor binding sites  
245 was done by enhancer-reporter luciferase assays, ChIP analyses and investigating a possible  
246 interaction between ELF5 and SATB1.

247

248 ***Luciferase reporter assays-*** To prepare the enhancer-reporter constructs, the *Satb1*

249 enhancer sequence was cloned into the KpnI and XhoI sites of pGL4.25[luc2CP/minP] firefly  
250 luciferase vector containing a minimal TATA promoter (Promega). Rcho1 TS cells were used for  
251 the reporter assay. Twenty-four h after plating in 12-well plates, Rcho1 cells were transfected with  
252 the enhancer-reporter vector along with a control Renilla luciferase vector (pGL4.74 [hRluc/TK])  
253 using Lipofectamine 2000 (Thermo Fisher Scientific). Expression vectors for SATB1, SATB2 or  
254 ELF5 were individually cotransfected with the reporter vector to assess their regulatory role on the  
255 enhancer sequence. 12h after the transfection, transfection medium was replaced with cell  
256 proliferation medium and cultured for another 12h. 24h after transfection, cells were washed with  
257 cold PBS, lysed in 100µl of passive lysis buffer and standard dual luciferase assays were performed  
258 on the cell lysates by using Dual-Luciferase Reporter Assay reagents (Promega).

259

260 *ChIP assays*- ChIP assays were performed as describe above.

261

262 *ELF5-SATB1 interaction*- Protein-protein interaction was investigated by co-  
263 immunoprecipitation. Rcho1 cells stably expressing FLAG-tagged SATB1 or ELF5 were  
264 harvested to extract nuclear proteins. Nuclear proteins were extracted in nondenaturing buffer  
265 (20mM Tris-HCl pH 7.5, 2mM EDTA) adjusted to 0.3 M NaCl and 0.5% Triton X-100. After  
266 centrifugation at 40,000g for 1h at 4C in a Ti-70 rotor, the supernatants were mixed with anti-  
267 FLAG (M2) magnetic beads (Millipore Sigma) at a ratio of 100 µl of beads/1 ml of nuclear extract  
268 and gently rocked overnight at 4<sup>0</sup>C. The beads with immunoprecipitated protein complexes were  
269 washed 8 times with wash buffer containing 50mM Hepes-NaOH, pH 7.9, 0.25 M KCl, 0.1%  
270 Triton X-100, and then eluted with 200µl of wash buffer containing 0.4mg/ml FLAG peptide  
271 (Millipore Sigma). Eluted proteins were mixed with 2xSDS sample buffer, boiled for 10min,

272 separated on SDS-PAGE, and processed for Western blot analysis.

273

274 **ELF5 regulation of *Satb1* expression in TS cells.** The TS regulators ELF5 and SATB  
275 proteins demonstrated a high level of transcriptional activation of the *Satb1* enhancer in luciferase  
276 assays. We further analyzed the role of ELF5 in regulating *Satb1* expression using a 'loss of  
277 function' study.

278

279 *Elf5* knockdown- For the loss of function studies, *Elf5* was knocked down in Rcho1 cells  
280 by lentiviral delivery of shRNAs. *Elf5* shRNAs, cloned into the lentiviral vector pLKO.1, were  
281 obtained from Millipore Sigma (St. Louis, MO). A control shRNA that does not target any known  
282 mammalian gene, pLKO.1-shSCR (Addgene, Plasmid #1864), was obtained from Addgene  
283 (Cambridge, MA). Lentiviral packaging vectors from Addgene (pMDLg/pRRE Plamid # 12251,  
284 pRSV-Rev Plasmid #12253 and pMD2.G Plasmid# 12259) were used to produce the viral particles  
285 in 293T cells as described earlier [36]. Culture supernatants containing lentiviral particles were  
286 harvested every 24 h for 2 days, centrifuged to remove cell debris, filtered, and applied to Rcho1  
287 cells in culture. Transduced cells were selected for puromycin resistance. *Elf5* knockdown as well  
288 as the effect of *Elf5* knockdown on *Satb1* expression was assessed by RT-qPCR assays.  
289 Functionally active shRNA sequences are shown in Table S8.

290

## 291 **RESULTS**

292 **Trophoblast-specific expression of *Satb1*.** Expression of *Satb1* mRNA and protein was  
293 examined in mouse TS, ES and XEN cells. Mouse TS cells exhibited a much higher level of *Satb1*  
294 expression than ES and XEN cells (Fig. 1A-C, E, F). Expression of *Satb1* in mouse TS cells

295 declined upon induction of trophoblast differentiation (Fig. 1D). Mouse ES or XEN cells  
296 minimally express *Satb1* in the stem-state (Fig. 1A-C, E, F); however, the expression of *Satb1* was  
297 induced when mouse ES cells were reprogrammed to a trophoblast fate by overexpression of  
298 CDX2 (Fig. 1G) or GATA3 (Fig. 1H). In addition, *Satb1* expression was also increased when  
299 human ES cells were differentiated into trophoblast cells following BMP4 treatment (Fig. 1I).

300

301 ***Satb1* promoters in trophoblast cells.** Reference sequences of four different transcript  
302 variants of mouse *Satb1* mRNA have been reported and validated (Fig. S1A, B). RT-PCR analyses  
303 suggested that the first exon in each variant is transcribed from alternative transcription start sites  
304 over a span of 21kbp of genomic DNA (Fig. 2 A-C and Fig. S1). Only variant 1 and 2 transcripts  
305 were detected in mouse trophoblast cells of e7.5 ectoplacental cones (EPCs) (Fig. 2C), with variant  
306 2 being the predominant transcript (Fig. 2C and 3C). ChIP-sequencing (ChIP-seq) analyses for  
307 H3K27ac in mouse e7.5 EPCs demonstrated the presence of this transcription activation mark in  
308 the proximal promoters of both transcript variants (Fig. 2D). Both promoters also contained CpG  
309 islands (Fig. 2D). Next, the variant 2 promoter in mouse TS cells was examined for active histone  
310 marks. ChIP assay results supported the early placental ChIP-seq data for H3K27ac (Fig. 2E). The  
311 promoter also showed enriched marks of H3K4me3 (Fig. 2F) and RNA polymerase II (Pol II)  
312 occupancy (Fig. 2G), while the positive and negative control primer sets exhibited expected  
313 enrichment of histone marks or Pol II binding (Fig. S1).

314

315 **Identification of a distant-acting enhancer for *Satb1* gene.** RT-qPCR data indicate that  
316 the expression of both transcript variants of mouse *Satb1* was markedly reduced during  
317 differentiation of mouse TS cells *in vitro* (Fig. 3 A, B). A similar reduction in *Satb1* expression

318 was also detected *in vivo* with RNA-sequencing (RNA-seq); expression of both variant 1 and  
319 variant 2 were significantly decreased in e9.5 compared to e7.5 placenta (Fig. 3 C). Such  
320 reductions in expression correlated well with the changes in H3K27ac activity within a potential  
321 cis-acting enhancer region (*enhancer S*) approximately 21kbp upstream of the *Satb1* variant 2  
322 promoter (Fig. 3 D). ChIP assays using mouse TS cells also detected enriched histone marks of  
323 H3K27ac and H3K9ac, as well as enrichment of Pol II binding in the enhancer region (Fig. 3 E-  
324 G). We termed this distant-acting cis enhancer as *enhancer S*, a potential enhancer of *Satb1*.

325

326 **Distant-acting enhancer S is required for maintaining *Satb1* expression in TS cells.**

327 Using the CRISPR/Cas9 methodology, we investigated whether the distant enhancer was required  
328 for maintaining *Satb1* expression in TS cells. Transfection of expression vectors encoding Cas9  
329 and the enhancer targeted gRNAs resulted in deletion of *enhancer S* in Rcho1 rat TS cells (Fig. 4  
330 A). Deletion of the enhancer caused a dramatic reduction in *Satb1* expression (Fig. 4 B), which  
331 was associated with induction of premature differentiation in Rcho1 cells maintained in a  
332 proliferating culture condition (Fig. 4 D-H). Premature differentiation of Rcho1 cells was  
333 identified by the reduction of stem markers *Cdx2* and *Eomes*, and an increase of the differentiation  
334 marker *Prl3b1* (Fig. 4 D-F). To determine whether the reduction in *Satb1* expression was due to  
335 induction of differentiation or disruption of *enhancer S*, we further investigated its requirement  
336 using CRISPR interference. Transfection of dCas9-repressor (dCas9-KRAB) and gRNAs targeted  
337 to the enhancer sequence also markedly reduced *Satb1* expression (Fig. 4 I). CRISPR interference  
338 of *enhancer S* reduced *Satb1* expression in the same way as interference of the variant 2 promoter  
339 in Rcho1 TS cells (Fig. 4J).

340

341           **Enhancer S loops into the proximal promoter to regulate *Satb1* expression.** We  
342 examined the molecular mechanism as to how the distant-acting *enhancer S* regulated *Satb1*  
343 expression. Involvement of chromatin looping that can bring the enhancer into proximity with the  
344 promoter was tested by chromatin conformation capture (3C) in mouse TS cells (Fig. 5 A, B). A  
345 looping interaction between *enhancer S* and the *Satb1* variant 2 promoter was detected by 3C-PCR  
346 in mouse TS cells, but not in MEFs (Fig. 5C). Restriction analyses (Fig. 5D) and DNA sequencing  
347 (Fig. 5 E) confirmed that the 3C-PCR captured and amplified a ligation between the distant-acting  
348 *enhancer S* and the *Satb1* variant 2 promoter.

349  
350           **Transcriptional regulation of enhancer S in TS cells.** Scanning position weight matrix  
351 (PWM) analyses (Fig. 6 A, B) of *enhancer S* using TFBSTools predicted two ELF5 binding sites  
352 in close vicinity of SATB1 binding sites (Fig. 6C). ChIP assays also demonstrated a marked  
353 enrichment of ELF5, SATB1 and SATB2 binding to the enhancer locus (Fig. 6 D-F) as well as the  
354 *Satb1* variant 2 promoter (Fig. 6 G-I).

355  
356           ELF5 and SATB proteins exhibited trophoblast stem-state specific differential expression  
357 both *in vivo* and *in vitro* (Fig. 7, A-F). We further analyzed the role of ELF5 in regulation of *Satb1*  
358 expression by shRNA mediated knockdown of *Elf5* in Rcho1 TS cells (Fig. 7 G, H). Knockdown  
359 of ELF5 significantly downregulated the expression of *Satb1* (Fig. 7 H).

360  
361           To assess the role of these transcriptional regulators on *enhancer S*, a reporter construct  
362 was prepared by cloning the enhancer upstream of a minimal TATA promoter within  
363 pGL4.25[luc2CP/minP] firefly luciferase vector (Fig. 8B). Cotransfection of the enhancer-reporter



364 and expression vectors for ELF5, SATB1 or SATB2 into Rcho1 rat TS cells significantly  
365 upregulated reporter activity (Fig. 8 C-E). Furthermore, co-immunoprecipitation of either ELF5  
366 or SATB1 with Rcho1 nuclear proteins detected an interaction between ELF5 and SATB1 (Fig. 8  
367 F, G). Taken together, we propose a model of ELF5-SATB1 interaction that regulates *Satb1*  
368 expression in the trophoblast stem-state (Fig. 8 H).

369

## 370 **DISCUSSION**

371 SATB proteins play essential regulatory roles in a range of stem cells [15-17, 19]. During  
372 early embryonic development, ES, TS, and XEN cells are the three stem cell lineages that give rise  
373 to the embryo proper, placenta, and yolk sac, respectively. Among these three stem cell lineages,  
374 only TS cells exhibit robust expression of SATB1 (Fig. 1 and S1). However, *Satb1* was induced  
375 during reprogramming of mouse ES cells to TS cells, which was also reported in a previous study  
376 [26]. Such induction of *Satb1* expression during reprogramming of ES cells to trophoblast fate  
377 indicates that trophoblast-specific cell signaling facilitates the expression. It has recently been  
378 shown that FGF4 signaling, which is essential for TS cell maintenance, may impact *Satb1*  
379 expression in mouse preimplantation embryos [17].

380

381 Expression of *Satb1* in trophoblast cells has been reported to be stem-state-specific both *in*  
382 *vivo* and *in vitro* [18, 19]. Differential expression of *Satb1* in the trophoblast stem-state suggests  
383 an important role for stem-specific transcriptional regulators controlling its expression. However,  
384 the upstream transcription factors that regulate stem-state specific expression of *Satb1* in  
385 trophoblast cells are still unknown.

386

387           *Satb1* is an essential regulator of T cell differentiation and FoxP3 plays an important role  
388 in transcriptional repression of *Satb1* in regulatory T cells [37]. *Satb1* is also an important  
389 chromatin regulator in epidermis, where p63 is essential for maintaining *Satb1* gene expression  
390 [38]. However, based on available GEO data (GSE12999 and GSE21938) expression of both  
391 FoxP3 and p63 is very low in TS cells, and they do not show any change in expression with  
392 induction of differentiation [18, 26]. These findings suggest that regulation of *Satb1* in trophoblast  
393 cells is different from T cells and epidermis. To explore the trophoblast-specific *Satb1* regulation,  
394 we identified *Satb1* promoters in TS cells. In contrast to T cells that express all four *Satb1* variants,  
395 only variant 1 and 2 transcripts were detected in trophoblast cells, with variant 2 being  
396 predominant. These proximal promoters were enriched with H3K27ac and H3K4me3, which are  
397 marks of active promoters [39]. Presence of CpG islands within the promoters of *Satb1* suggests  
398 its potential role as a master developmental regulator [40-42].

399

400           An enhancer region ~21kbp upstream of the *Satb1* variant 2 promoter was identified based  
401 on active histone marks [29]. Changes in H3K27ac activity in this enhancer region (*enhancer S*)  
402 correlated with *Satb1* expression levels in trophoblast cells. Requirement of the enhancer for *Satb1*  
403 expression was demonstrated by CRISPR/CAS9 mediated targeted deletion of this region.  
404 Targeted deletion of *enhancer S* reduced *Satb1* expression, which caused differentiation of Rcho1  
405 TS cells maintained in proliferating media. This observation is in line with our previous report that  
406 found induction of TS cell differentiation following *Satb1* knockdown [19]. However, trophoblast  
407 differentiation due to other reasons can also lead to inhibition of *Satb1* expression. We utilized a  
408 transient induction of CRISPR interference to avoid the effect of cell differentiation. CRISPR  
409 interference provided direct evidence for the importance of this enhancer in regulating *Satb1*

410 expression in TS cells.

411

412 Long-range chromatin interactions can occur intrachromosomally or interchromosomally  
413 [43, 44]. Intrachromosomal interactions have been reported between promoters and enhancers  
414 located far away from each other [43, 44]. In this study, we detected a chromatin looping of the  
415 cis-acting enhancer to the *Satb1* variant 2 promoter across a 21kbp distance. Bioinformatic  
416 analyses indicated potential ELF5 binding sites near SATB1 binding sites within *enhancer S*  
417 region. ChIP and reporter assays demonstrated that ELF5 and SATB homeobox proteins bind to  
418 *enhancer S* and had a stimulatory effect on the enhancer-activity. Binding of ELF5, SATB1 and  
419 SATB2 was also detected within the proximal promoter (Fig. S3 E-G). These findings suggest that  
420 the looping interaction between the enhancer and the proximal promoter in mouse TS cells was  
421 mediated by SATB proteins in association with ELF5. In TS cells, ELF5 can interact with other  
422 transcription factors and act as a molecular switch regulating cell differentiation [45]. SATB1 and  
423 SATB2 can also form heterodimers to regulate gene expression [19, 46]. It is also well-known that  
424 SATB1 can mediate long-range chromatin interactions for gene regulation [4, 47, 48]. Thus, ELF5  
425 interaction with SATB1 to regulate gene expression over a long distance is a plausible mechanism  
426 of the transcriptional regulation of *Satb1*.

427

428 Trophoblast stem-specific *Satb1* expression suggests that differentially expressed stem-  
429 factors may play a crucial role in regulation of *Satb1*. Indeed, SATB proteins as well as ELF5  
430 exhibited trophoblast stem-specific differential expression both in vivo and in vitro (Fig. S4 A-F).  
431 We identified that ELF5 plays an important role in regulating *Satb1* expression (Fig. S4 G, H).  
432 Developmentally, expression of ELF5 is restricted to the trophoblast lineage and creates a positive

433 feedback loop with other TS cell determinants [49]. We previously demonstrated that SATB  
434 proteins contribute to the TS cell stem-state by sustaining the expression of TS factors [19].  
435 Therefore, it is likely that SATB proteins interact with ELF5 in TS cells to augment a positive  
436 feedback loop to maintain the trophoblast stem-state.

437

#### 438 **ACKNOWLEDGEMENTS**

439 This research was supported by National Institute of Health Grants HD079363 (M.A.R., W.Y.,  
440 and V.P.C) and HD079545 (G.T.).

441

#### 442 **CONFLICTS OF INTERESTS**

443 The authors declare that they have no conflicts of interest with the contents of this article.

444

#### 445 **AUTHOR CONTRIBUTIONS**

446 M.A.R. conceived and coordinated the study and prepared the manuscript. W.Y., S.B., V.P.C,  
447 A.R., R.R.S. and K.D. performed the experiments and analyzed that data. S.B. prepared the figures  
448 and edited the manuscript. M.W.W. and G.T. contributed to designing and editing the manuscript.  
449 All the authors approved final version of the manuscript.

450 **REFERENCES**

451

- 452 1. Dickinson, L.A., et al., *A tissue-specific MAR/SAR DNA-binding protein with unusual*  
453 *binding site recognition*. Cell, 1992. **70**(4): p. 631-45.
- 454 2. Dickinson, L.A., C.D. Dickinson, and T. Kohwi-Shigematsu, *An atypical homeodomain in*  
455 *SATB1 promotes specific recognition of the key structural element in a matrix attachment*  
456 *region*. J Biol Chem, 1997. **272**(17): p. 11463-70.
- 457 3. Dobрева, G., J. Dambacher, and R. Grosschedl, *SUMO modification of a novel MAR-*  
458 *binding protein, SATB2, modulates immunoglobulin mu gene expression*. Genes Dev,  
459 2003. **17**(24): p. 3048-61.
- 460 4. Yasui, D., et al., *SATB1 targets chromatin remodelling to regulate genes over long*  
461 *distances*. Nature, 2002. **419**(6907): p. 641-5.
- 462 5. Cai, S., H.J. Han, and T. Kohwi-Shigematsu, *Tissue-specific nuclear architecture and gene*  
463 *expression regulated by SATB1*. Nat Genet, 2003. **34**(1): p. 42-51.
- 464 6. Cai, S., C.C. Lee, and T. Kohwi-Shigematsu, *SATB1 packages densely looped,*  
465 *transcriptionally active chromatin for coordinated expression of cytokine genes*. Nat  
466 Genet, 2006. **38**(11): p. 1278-88.
- 467 7. Alvarez, J.D., et al., *The MAR-binding protein SATB1 orchestrates temporal and spatial*  
468 *expression of multiple genes during T-cell development*. Genes Dev, 2000. **14**(5): p. 521-  
469 35.
- 470 8. Notani, D., et al., *Global regulator SATB1 recruits beta-catenin and regulates T(H)2*  
471 *differentiation in Wnt-dependent manner*. PLoS Biol, 2010. **8**(1): p. e1000296.

- 472 9. Nakayama, Y., et al., *A nuclear targeting determinant for SATB1, a genome organizer in*  
473 *the T cell lineage*. Cell Cycle, 2005. **4**(8): p. 1099-106.
- 474 10. Wen, J., et al., *SATB1 family protein expressed during early erythroid differentiation*  
475 *modifies globin gene expression*. Blood, 2005. **105**(8): p. 3330-9.
- 476 11. Dobрева, G., et al., *SATB2 is a multifunctional determinant of craniofacial patterning and*  
477 *osteoblast differentiation*. Cell, 2006. **125**(5): p. 971-86.
- 478 12. Alcamo, E.A., et al., *Satb2 regulates callosal projection neuron identity in the developing*  
479 *cerebral cortex*. Neuron, 2008. **57**(3): p. 364-77.
- 480 13. Britanova, O., et al., *Satb2 is a postmitotic determinant for upper-layer neuron*  
481 *specification in the neocortex*. Neuron, 2008. **57**(3): p. 378-92.
- 482 14. Gyorgy, A.B., et al., *SATB2 interacts with chromatin-remodeling molecules in*  
483 *differentiating cortical neurons*. European Journal of Neuroscience, 2008. **27**(4): p. 865-  
484 873.
- 485 15. Will, B., et al., *Satb1 regulates the self-renewal of hematopoietic stem cells by promoting*  
486 *quiescence and repressing differentiation commitment*. Nat Immunol, 2013. **14**(5): p. 437-  
487 45.
- 488 16. Savarese, F., et al., *Satb1 and Satb2 regulate embryonic stem cell differentiation and*  
489 *Nanog expression*. Genes Dev, 2009. **23**(22): p. 2625-38.
- 490 17. Goolam, M. and M. Zernicka-Goetz, *The chromatin modifier Satb1 regulates cell fate*  
491 *through Fgf signalling in the early mouse embryo*. Development, 2017. **144**(8): p. 1450-  
492 1461.
- 493 18. Kent, L.N., T. Konno, and M.J. Soares, *Phosphatidylinositol 3 kinase modulation of*  
494 *trophoblast cell differentiation*. BMC Dev Biol, 2010. **10**: p. 97.

- 495 19. Asanoma, K., et al., *SATB homeobox proteins regulate trophoblast stem cell renewal and*  
496 *differentiation*. J Biol Chem, 2012. **287**(3): p. 2257-68.
- 497 20. Cockburn, K. and J. Rossant, *Making the blastocyst: lessons from the mouse*. J Clin Invest,  
498 2010. **120**(4): p. 995-1003.
- 499 21. Roberts, R.M. and S.J. Fisher, *Trophoblast stem cells*. Biol Reprod, 2011. **84**(3): p. 412-  
500 21.
- 501 22. Pfeffer, P.L. and D.J. Pearton, *Trophoblast development*. Reproduction, 2012. **143**(3): p.  
502 231-46.
- 503 23. Tanaka, S., et al., *Promotion of trophoblast stem cell proliferation by FGF4*. Science, 1998.  
504 **282**(5396): p. 2072-5.
- 505 24. Kunath, T., et al., *Imprinted X-inactivation in extra-embryonic endoderm cell lines from*  
506 *mouse blastocysts*. Development, 2005. **132**(7): p. 1649-61.
- 507 25. Sahgal, N., et al., *Rcho-1 trophoblast stem cells: a model system for studying trophoblast*  
508 *cell differentiation*. Methods Mol Med, 2006. **121**: p. 159-78.
- 509 26. Ralston, A., et al., *Gata3 regulates trophoblast development downstream of Tead4 and in*  
510 *parallel to Cdx2*. Development, 2010. **137**(3): p. 395-403.
- 511 27. Amita, M., et al., *Complete and unidirectional conversion of human embryonic stem cells*  
512 *to trophoblast by BMP4*. Proc Natl Acad Sci U S A, 2013. **110**(13): p. E1212-21.
- 513 28. Untergasser, A., et al., *Primer3Plus, an enhanced web interface to Primer3*. Nucleic Acids  
514 Res, 2007. **35**(Web Server issue): p. W71-4.
- 515 29. Tuteja, G., T. Chung, and G. Bejerano, *Changes in the enhancer landscape during early*  
516 *placental development uncover a trophoblast invasion gene-enhancer network*. Placenta,  
517 2016. **37**: p. 45-55.

- 518 30. Dale, R.K., B.S. Pedersen, and A.R. Quinlan, *Pybedtools: a flexible Python library for*  
519 *manipulating genomic datasets and annotations*. *Bioinformatics*, 2011. **27**(24): p. 3423-4.
- 520 31. Chuong, E.B., et al., *Endogenous retroviruses function as species-specific enhancer*  
521 *elements in the placenta*. *Nat Genet*, 2013. **45**(3): p. 325-9.
- 522 32. Kabadi, A.M. and C.A. Gersbach, *Engineering synthetic TALE and CRISPR/Cas9*  
523 *transcription factors for regulating gene expression*. *Methods*, 2014. **69**(2): p. 188-97.
- 524 33. Dekker, J., et al., *Capturing chromosome conformation*. *Science*, 2002. **295**(5558): p.  
525 1306-11.
- 526 34. Tan, G. and B. Lenhard, *TFBSTools: an R/bioconductor package for transcription factor*  
527 *binding site analysis*. *Bioinformatics*, 2016. **32**(10): p. 1555-6.
- 528 35. Wenger, A.M., et al., *PRISM offers a comprehensive genomic approach to transcription*  
529 *factor function prediction*. *Genome Res*, 2013. **23**(5): p. 889-904.
- 530 36. Lee, D.S., et al., *In vivo genetic manipulation of the rat trophoblast cell lineage using*  
531 *lentiviral vector delivery*. *Genesis*, 2009. **47**(7): p. 433-9.
- 532 37. Beyer, M., et al., *Repression of the genome organizer SATB1 in regulatory T cells is*  
533 *required for suppressive function and inhibition of effector differentiation*. *Nat Immunol*,  
534 2011. **12**(9): p. 898-907.
- 535 38. Fessing, M.Y., et al., *p63 regulates Satb1 to control tissue-specific chromatin remodeling*  
536 *during development of the epidermis*. *J Cell Biol*, 2011. **194**(6): p. 825-39.
- 537 39. Consortium, E.P., *An integrated encyclopedia of DNA elements in the human genome*.  
538 *Nature*, 2012. **489**(7414): p. 57-74.
- 539 40. Ponger, L., L. Duret, and D. Mouchiroud, *Determinants of CpG islands: expression in*  
540 *early embryo and isochore structure*. *Genome Res*, 2001. **11**(11): p. 1854-60.



- 541 41. Tanay, A., et al., *Hyperconserved CpG domains underlie Polycomb-binding sites*. Proc  
542 Natl Acad Sci U S A, 2007. **104**(13): p. 5521-6.
- 543 42. Vavouri, T. and B. Lehner, *Human genes with CpG island promoters have a distinct*  
544 *transcription-associated chromatin organization*. Genome Biol, 2012. **13**(11): p. R110.
- 545 43. Deng, W. and G.A. Blobel, *Do chromatin loops provide epigenetic gene expression states?*  
546 Curr Opin Genet Dev, 2010. **20**(5): p. 548-54.
- 547 44. Dean, A., *In the loop: long range chromatin interactions and gene regulation*. Brief Funct  
548 Genomics, 2011. **10**(1): p. 3-10.
- 549 45. Latos, P.A., et al., *Elf5-centered transcription factor hub controls trophoblast stem cell*  
550 *self-renewal and differentiation through stoichiometry-sensitive shifts in target gene*  
551 *networks*. Genes Dev, 2015. **29**(23): p. 2435-48.
- 552 46. Zhou, L.Q., et al., *The AT-rich DNA-binding protein SATB2 promotes expression and*  
553 *physical association of human (G)gamma- and (A)gamma-globin genes*. J Biol Chem,  
554 2012. **287**(36): p. 30641-52.
- 555 47. Gong, F., et al., *The BCL2 gene is regulated by a special AT-rich sequence binding protein*  
556 *I-mediated long range chromosomal interaction between the promoter and the distal*  
557 *element located within the 3'-UTR*. Nucleic Acids Res, 2011. **39**(11): p. 4640-52.
- 558 48. Yang, Y., et al., *SATB1 Mediates Long-Range Chromatin Interactions: A Dual Regulator*  
559 *of Anti-Apoptotic BCL2 and Pro-Apoptotic NOXA Genes*. PLoS One, 2015. **10**(9): p.  
560 e0139170.
- 561 49. Ng, R.K., et al., *Epigenetic restriction of embryonic cell lineage fate by methylation of Elf5*.  
562 Nat Cell Biol, 2008. **10**(11): p. 1280-90.

563

564 **FIGURE LEGENDS**

565

566 **Fig. 1. Trophoblast-specific expression of *Satb1*.** Mouse trophoblast stem (mTS) cells express  
567 high levels of SATB1 compared to mouse embryonic stem (mES) cells (A) or mouse  
568 extraembryonic endoderm (mXEN) cells (B) as detected by western blotting. CDX2, OCT4 and  
569 GATA4 were detected as lineage- markers. ACTB was detected as loading control. C)  
570 Immunofluorescence imaging also detected an abundant expression of SATB1 in mTS cells (Ca).  
571 Compared to mTS cells, the level of expression is remarkably lower in mES cells (Cb) and mXEN  
572 (Cc). *Satb1* mRNA levels in TS, ES and XEN cells (D-F) correlated well with the protein  
573 expression (A-C), and in mTS cells, the mRNA level is significantly reduced upon induction of  
574 trophoblast differentiation (D). Expression of *Satb1* was induced when mES cells were  
575 reprogrammed towards trophoblast lineage by the overexpression of CDX2 (G) or GATA3 (H).  
576 BMP4 induced reprogramming of human ES (hES) cells towards trophoblast lineage also  
577 upregulated *Satb1* expression (I). RT-qPCR data are expressed as the means  $\pm$  S.D. \*,  $p < 0.05$   
578 (n=3). Diff., differentiated mTS cells; Cont., control cells.

579

580 **Fig. 2. Detection of trophoblast-specific *Satb1* promoters.** A) Schematic presentation of the  
581 mouse *Satb1* gene locus showing four transcript variants, each transcribed from a variant-specific  
582 alternative exon 1. Nucleotide positions are indicated with respect to the start site (TSS) of variant  
583 1. B) Strategy of PCR-based detection of different transcript variants. C) *Satb1* transcript variants  
584 and alternative transcription start sites were detected in mouse embryonic day 7.5 (e7.5)  
585 ectoplacental cone (EPC) by RT-PCR analyses. *Satb1* transcript variants in mouse thymus, spleen,  
586 brain and liver were detected as controls for comparison. D) ChIP-seq data on e7.5 EPCs

587 demonstrated that both variant 1 and 2 proximal promoters possessed active histone marks of  
588 acetylated histone H3 lysine 27 (H3K27ac). The promoters also contained CpG islands (D). Using  
589 ChIP assays, the variant 2 promoter in mouse TS cells was assessed for transcriptionally active  
590 histone marks of H3K27ac (E) and H3K4me3 (F), which were associated with enriched RNA  
591 polymerase II (Pol II) binding (G). ChIP-qPCR primers located in the proximal promoter region  
592 is shown schematically in E-G. The primer sequences are mentioned in Table S4. ChIP-qPCR data  
593 are expressed as the means  $\pm$  S.D. \*,  $p < 0.05$  (n=3).

594

595 **Fig. 3. A long-distance enhancer regulates *Satb1* expression in mouse TS cells.** RT-qPCR  
596 analyses indicate that expression of *Satb1* transcript variants 1 and 2 was markedly reduced in  
597 differentiated mouse TS cells (A, B). A similar reduction in *Satb1* expression was also detected by  
598 RNA-seq analyses (C). The expression of both transcript variants was markedly reduced in e9.5  
599 mouse placenta compared to that in e7.5 placenta (C). Such reductions in *Satb1* expression level  
600 correlated with the epigenetic marks of the active chromatin state of *Satb1* promoters and an e7.5-  
601 specific distal enhancer (*enhancer S*) region ~21kbp upstream of the variant 2 transcription start  
602 site, as detected by H3K27ac ChIP-seq (D). Mouse TS cells were positive for enrichment of  
603 H3K27ac, and H3K9ac at the potential enhancer site (E, F). Enriched Pol II binding at the enhancer  
604 was also detected by ChIP assays (G). ChIP-qPCR primers located in the enhancer region is shown  
605 schematically in F-H. The primer sequences are mentioned in Table S4. RNA-seq FPKM, RT-  
606 qPCR and ChIP-qPCR data are expressed as the means  $\pm$  S.D. \*,  $p < 0.05$  (n=3). EPC, ectoplacental  
607 cone; Plac., Placenta.

608

609 **Fig. 4. Enhancer S is required for *Satb1* expression.** Rcho1 rat trophoblast cells were transfected  
610 with Cas9 and control or targeted gRNA expression constructs. Stably transfected cells were  
611 selected and assessed for targeted deletion of the enhancer. Applying the CRISPR/Cas9 system  
612 resulted in the deletion of the gRNA targeted site in *enhancer S* ( $\Delta$  Enh S) (A), decreased *Satb1*  
613 expression (B) and caused differentiation of Rcho1 cells (C-H). The requirement of *enhancer S*  
614 was further confirmed by transient transfection of dCas9-KRAB and the enhancer targeted gRNAs  
615 (iEnh S) (I). Transfection of gRNAs targeted to the variant 2 promoter (iVar2P) was used as  
616 positive control (J). RT-qPCR data are expressed as the means  $\pm$  S.D. \*,  $p < 0.05$  (n=3).

617

618 **Fig. 5. Enhancer S loops into the *Satb1* promoter in mouse TS cells.** (A) Schematic diagram of  
619 the mouse *Satb1* locus showing the variant 2 promoter (var 2 prom), transcription start site (TSS),  
620 *Bgl* II restriction sites, and 3C PCR primer positions. B) Representation of the major steps of 3C  
621 PCR-based detection of the looping and interaction of *enhancer S* with the *Satb1* var 2 promoter.  
622 3C PCR detected a physical interaction of the enhancer with the *Satb1* promoter in mouse TS  
623 (mTS) cells but not in mouse embryonic fibroblast (MEF) cells (C). The 3C PCR product (648bp)  
624 was confirmed by restriction analyses (D) as well as DNA sequencing (E). \* indicates DNA  
625 ligation site. Ladr., DNA ladder.

626

627 **Fig. 6. ELF5 and SATB proteins bind within the enhancer S in mouse TS cells.** A, B) PWMs  
628 of ELF5 and SATB1 used for scanning the enhancer S sequence (Chr17: 51993298-51994604)  
629 using TFBSTools. C) Transcription factor binding site analysis by TFBSTools predicted the  
630 presence of two ELF5 binding sites near SATB1 binding sites within *enhancer S*. ChIP assays also

631 demonstrated significant enrichment of ELF5, SATB1 and SATB2 in the enhancer locus of mTS  
632 cells (D-F). G-I), In addition to the enhancer region, binding of ELF5, SATB1 and SATB2 was  
633 detected in the *Satb1* variant 2 promoter in mTS cells. ChIP-qPCR data are expressed as the means  
634  $\pm$  S.D. \*,  $p < 0.05$  (n=3).

635

636 **Fig. 7. ELF5 regulates *Satb1* expression in TS cells.** A-C) RNA-seq analyses show that  
637 expression of *Satb1*, *Satb2* and *Elf5* is dramatically reduced in mouse e9.5 placentas compared to  
638 e7.5 EPCs. Similar findings were observed by RT-PCR analyses of mouse placenta samples  
639 collected during the progression of gestation (D). Both mouse TS cells and Rcho1 rat TS cells  
640 exhibited a similar reduction in SATB1, SATB2 and ELF5 proteins with induction of  
641 differentiation (E, F). G, H), Rcho1 rat TS cells were stably transduced with *Elf5* shRNAs. shRNA  
642 mediated knockdown of *Elf5* (G) significantly reduced the *Satb1* mRNA level (H) highlighting its  
643 role in transcriptional regulation of *Satb1*. RNA-Seq FPKM and RT-qPCR data are expressed as  
644 the means  $\pm$  S.D. \*,  $p < 0.05$  (n=3).

645

646 **Fig. 8. ELF5-SATB1 interaction within the enhancer S.** A) Schematic diagram showing the  
647 TFBSTools-detected two ELF5 binding sites near SATB1 motifs in mouse *Satb1* enhancer  
648 sequence. B) An enhancer-reporter construct was prepared by cloning 1.5 Kb of *enhancer S*  
649 upstream of a minimal TATA promoter within the *Luc2CP* firefly luciferase vector. C-E), Ectopic  
650 expression of ELF5, SATB1 or SATB2 in Rcho1 rat TS cells significantly upregulated the  
651 promoter-reporter activity. Furthermore, co-immunoprecipitation of either ELF5 or SATB1 with  
652 Rcho1 nuclear proteins exhibited that SATB1 interacts with ELF5 in trophoblast cells (F, G).

653 Taken together, we propose a model of ELF5-SATB interaction that regulates *Satb1* expression in  
654 the trophoblast stem-state (H). Luciferase assay data are expressed as the means  $\pm$  S.D. \*,  $p < 0.05$   
655 (n=3). ELF5-F, ELF5 with C-terminal FLAG tag; F-SATB1, SATB1 with N-terminal FLAG Tag.

656

657 **Fig. S1. *Satb1* transcript variants and control experiments for ChIP assays.** A) Schematic  
658 diagram showing the reference 5' sequences of four different transcript variants of mouse *Satb1*.  
659 B) The accession numbers, noncoding variant specific first exons, common second exons, coding  
660 sequences (CDS), and the transcription start sites on mouse chromosome 17 are presented in a  
661 tabulated form. Mouse positive and negative control primer sets were used for validating the ChIP  
662 assays (Fig. S1). ChIP-qPCR data are expressed as the means  $\pm$  S.D. \*,  $p < 0.05$  (n=3). NC,  
663 Negative Control Primer Set; PC, Positive Control Primer Set.

664

665

666

Figure 1

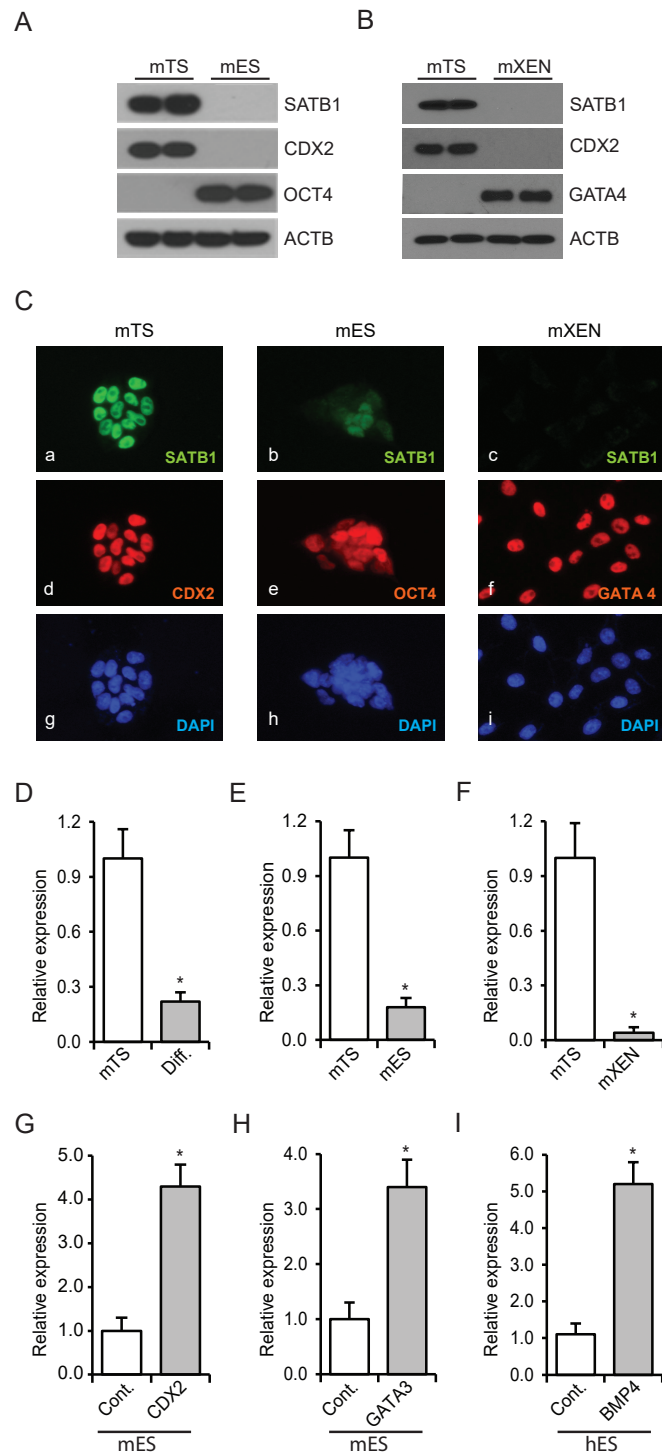

Figure 2

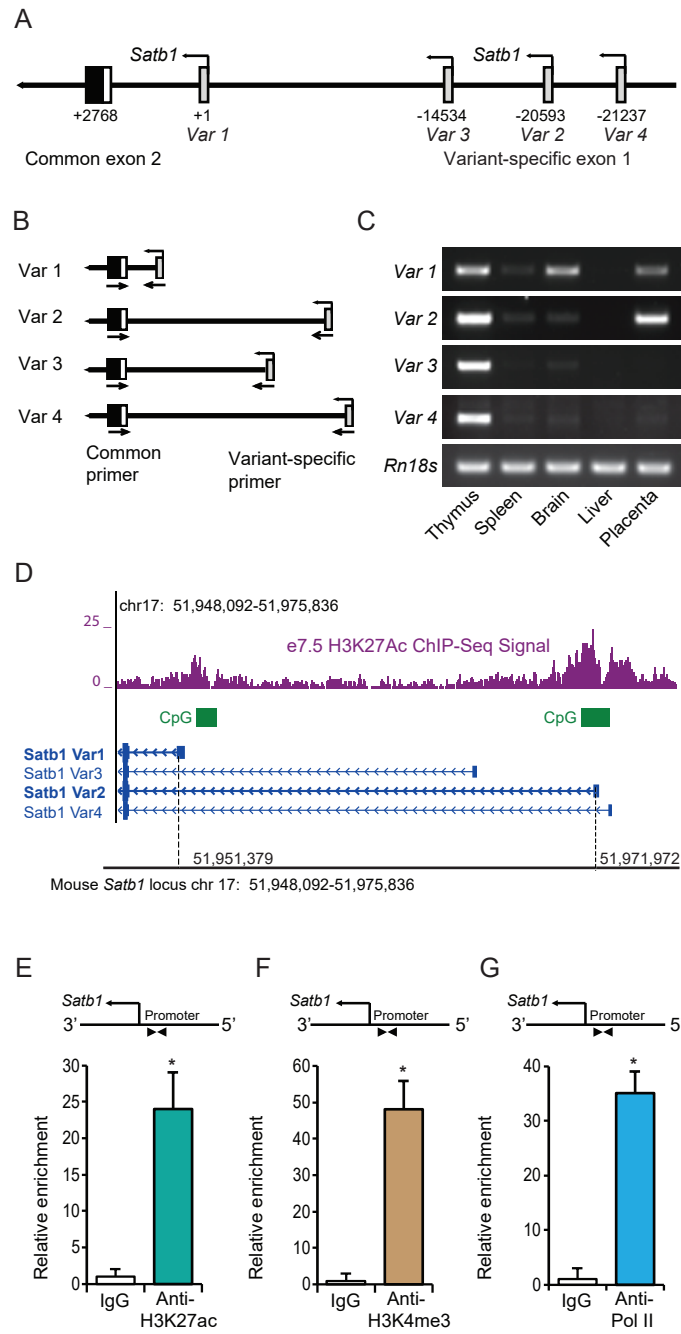



Figure 3

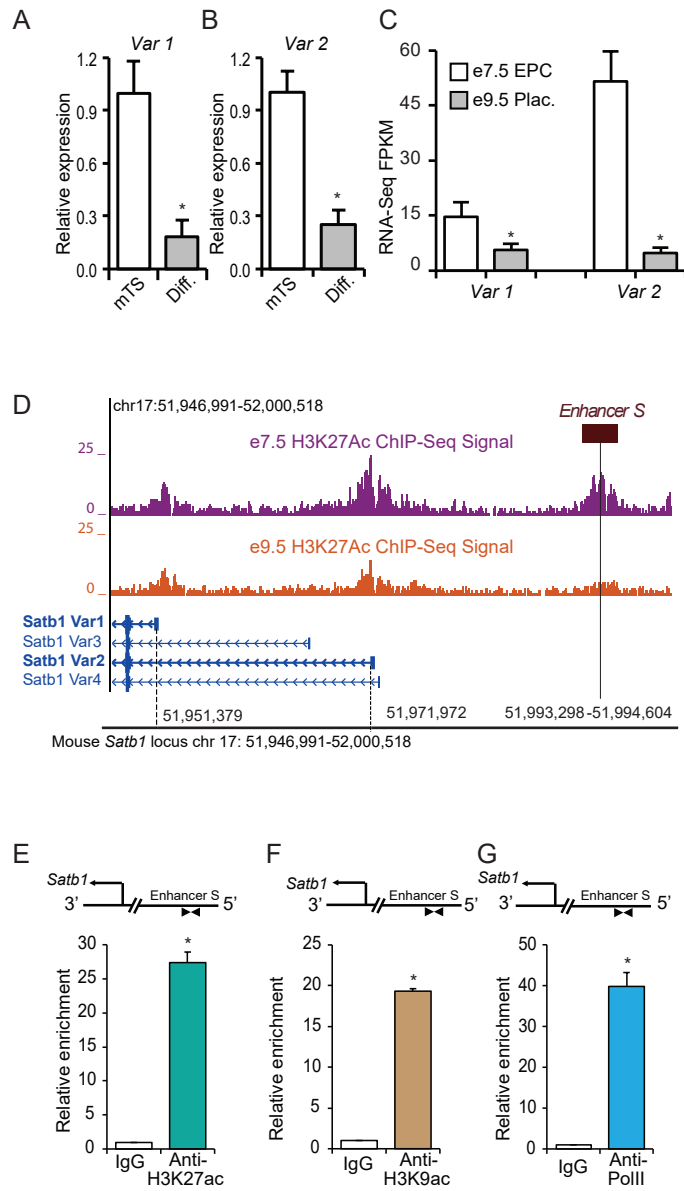

Figure 4

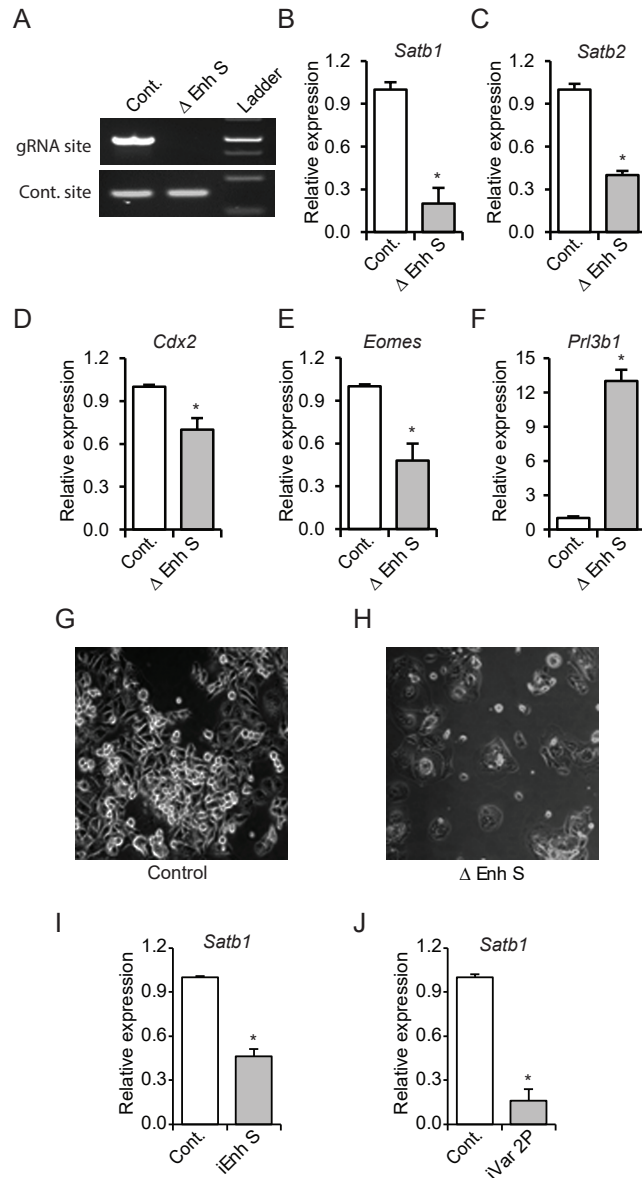

Figure 5

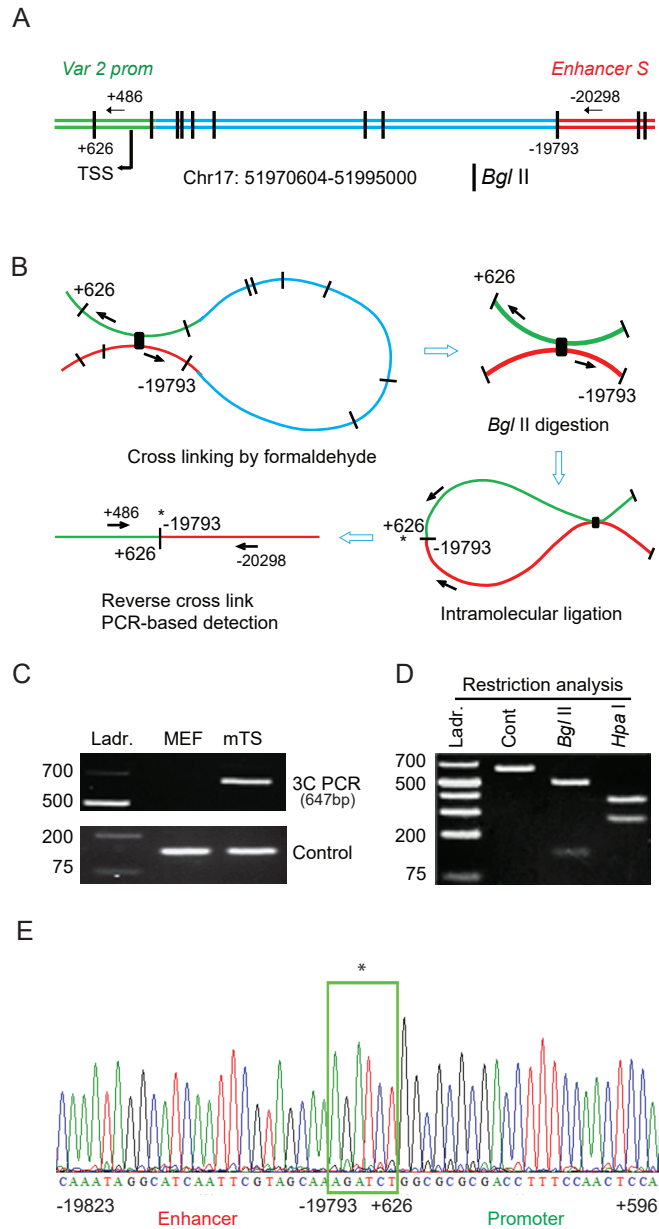

Figure 6

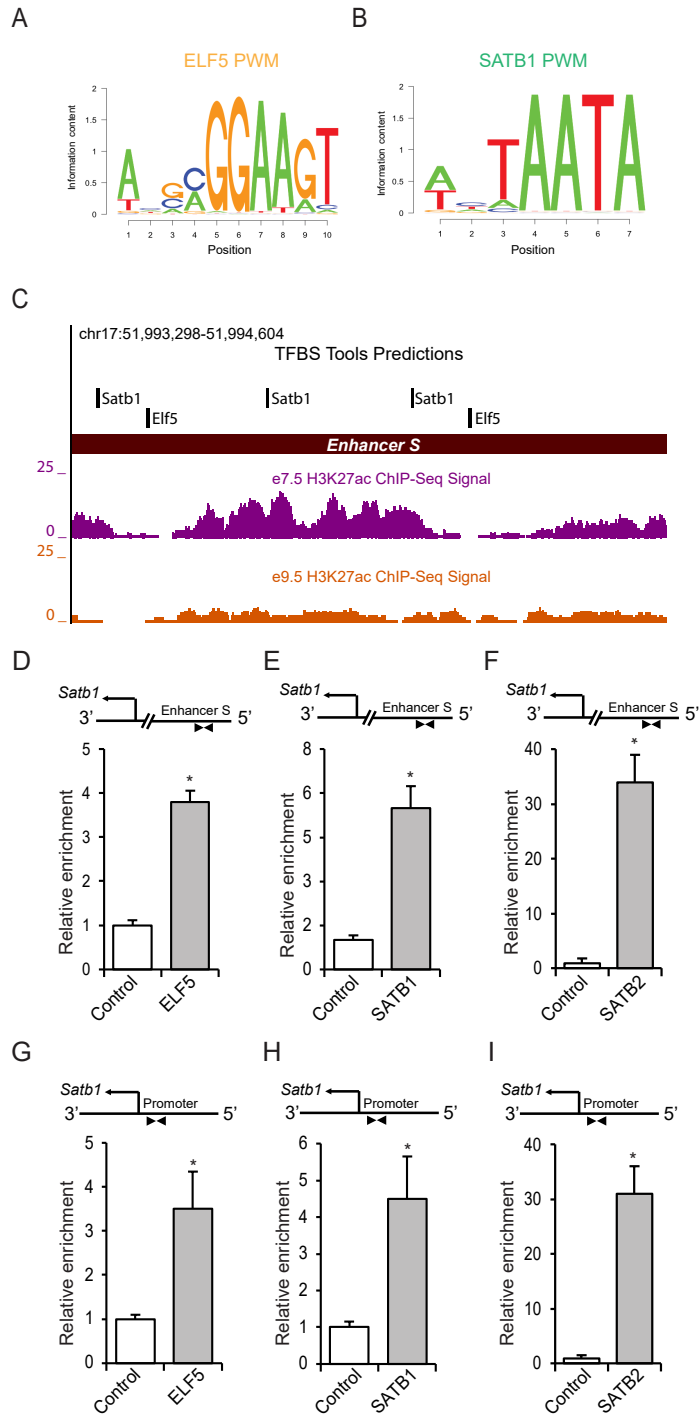

Figure 7

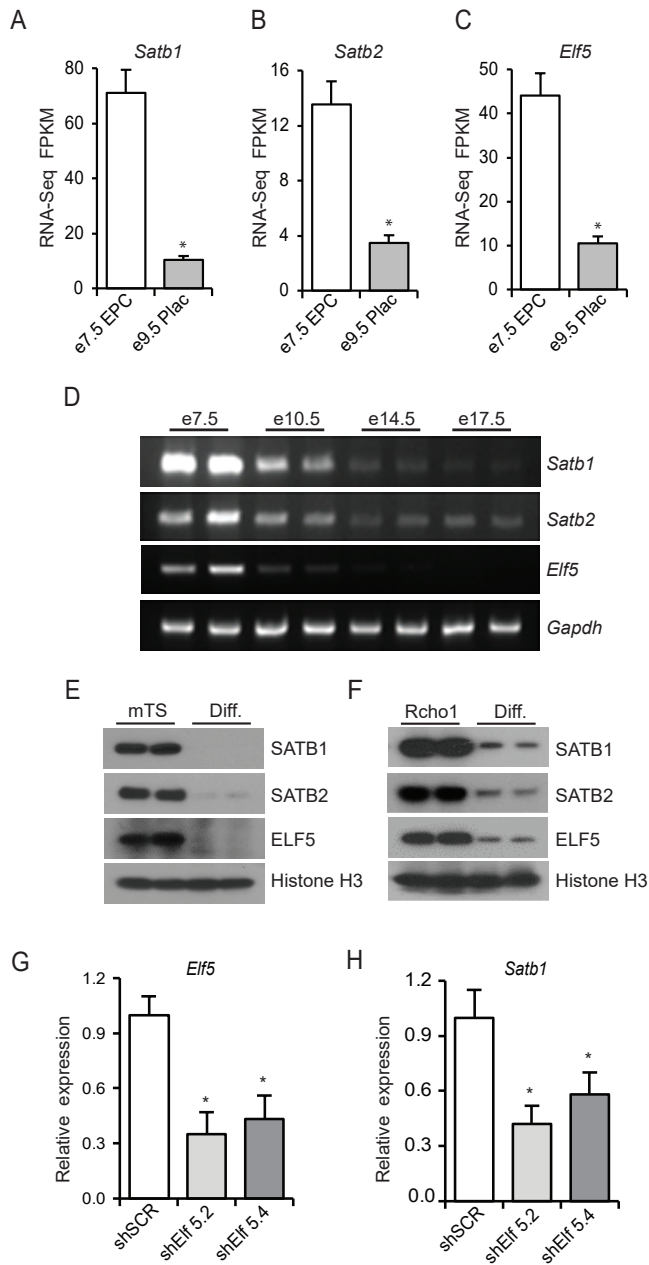

Figure 8

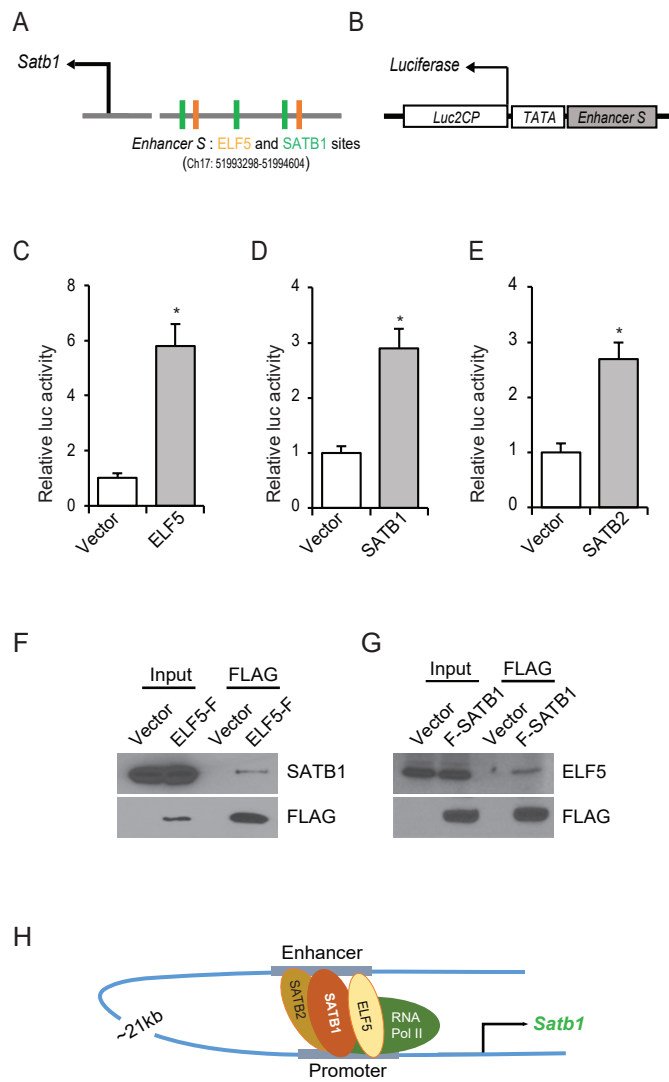

Source: http://biorxiv.org/content/10.1101/2020.09.11.294181v1.full.pdf
