# Supplementary material for: A long-range chromatin interaction regulates SATB homeobox 1 gene expression in trophoblast stem cells
Source: bioRxiv or medRxiv preprint supplement (doi:10.1101/2020.09.11.294181), 2020-09-11

Figure S1

A

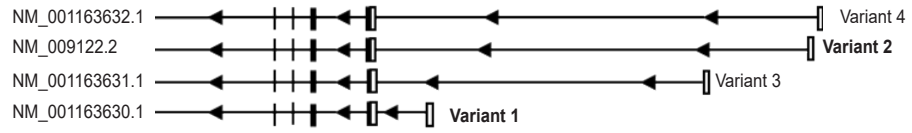

B

| Variant | Reference mRNA | Exon 1 | Exon 2  | CDS      | Transcription start site |
|---------|----------------|--------|---------|----------|--------------------------|
| 1       | NM_001163630.1 | 1-287  | 288-532 | 322-2616 | Chr17: 51951379          |
| 2       | NM_009122.2    | 1-178  | 179-423 | 213-2507 | Chr17: 51971972          |
| 3       | NM_001163631.1 | 1-155  | 156-400 | 190-2484 | Chr17: 51965913          |
| 4       | NM_001163632.1 | 1-128  | 129-373 | 163-2457 | Chr17: 51972615          |

C

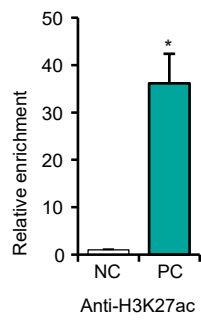

D

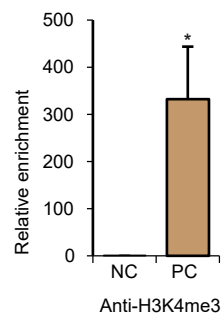

E

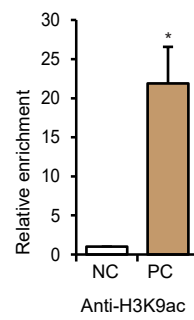

F

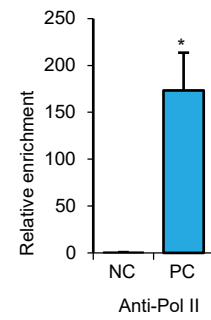

Supplement: Supplementary file [file media-2.pdf]
